# Supplementary material
Source: publisher site journal article supplement (https://www.degruyterbrill.com/publication/isbn/9783839472736/downloadAsset/9783839472736_Leseprobe.pdf)
Supplement: Supplementary file 1 [file 9783839472736_Leseprobe.pdf]

Müslüm Örtülü

# DER DEMOKRATISCHE KONFÖDERALISMUS

Eine politische Alternative für den Mittleren Osten?

**Aus:**

*Müslüm Örtülü*

## **Der demokratische Konföderalismus**

Eine politische Alternative für den Mittleren Osten?

Juni 2024, 306 S., kart., 13 Farbabbb.

47,00 € (DE), 978-3-8376-7273-2

E-Book: kostenlos erhältlich als Open-Access-Publikation

PDF: ISBN 978-3-8394-7273-6

EPUB: ISBN 978-3-7328-7273-2

Der demokratische Konföderalismus strebt im Nahen und Mittleren Osten eine neue Gesellschaftsordnung jenseits des kapitalistischen Nationalstaatsystems an. Basisdemokratie, Geschlechterbefreiung und eine ökologisch-gemeinwohlorientierte Wirtschaft sollen an die Stelle hierarchischer, patriarchalischer und profitorientierter Strukturen treten. Doch woher kommt dieses Gesellschaftsmodell, was sind seine theoretischen Grundlagen und wie lässt es sich in einer kriegsgeschüttelten Region umsetzen? Müslüm Örtülü erörtert, ob der demokratische Konföderalismus tatsächlich eine Alternative zum »westlichen Entwicklungsweg« bietet – und ob in diesem Zuge auch eine Wiederaneignung von Politik, Wirtschaft und Wissen gelingen kann.

**Müslüm Örtülü**, geb. 1987, ist Politikwissenschaftler. Seine Forschungs- und Arbeitsschwerpunkte sind der Nahe und Mittlere Osten, die Türkei sowie Kolonialismus, Dekolonisierung und koloniale Kontinuitäten.

Weitere Informationen und Bestellung unter:  
[www.transcript-verlag.de/978-3-8376-7273-2](http://www.transcript-verlag.de/978-3-8376-7273-2)

# Inhalt

---

|                                                                                 |    |
|---------------------------------------------------------------------------------|----|
| <b>Danksagung</b> .....                                                         | 11 |
| <b>Abkürzungsverzeichnis</b> .....                                              | 13 |
| <b>Glossar</b> .....                                                            | 15 |
| <b>1. Einleitung</b> .....                                                      | 21 |
| 1.1 Stand der Forschung und Forschungslücke .....                               | 23 |
| 1.2 Fragestellung .....                                                         | 25 |
| 1.3 Theoretischer Zugang und Methode .....                                      | 26 |
| 1.4 Begriffsdefinitionen .....                                                  | 27 |
| 1.5 Aufbau der Arbeit und Vorgehen .....                                        | 28 |
| <b>2. Theoretischer Rahmen: Die Post-Development Theorie</b> .....              | 31 |
| 2.1 Was bedeutet Entwicklung? .....                                             | 31 |
| 2.1.1 Entwicklung als Politikfeld und Wissenschaft .....                        | 33 |
| 2.1.2 Die fünf Stufen der Entwicklung .....                                     | 35 |
| 2.1.3 Die exogenen Faktoren der Unterentwicklung .....                          | 37 |
| 2.1.4 Neoliberale Entwicklungspolitik .....                                     | 39 |
| 2.1.5 Das ›Amöbenwort‹ Entwicklung .....                                        | 44 |
| 2.2 Die Post-Development Kritik an der Entwicklungsidee .....                   | 45 |
| 2.2.1 Entwicklung als Diskurs .....                                             | 46 |
| 2.2.2 Alternativen zur Entwicklung .....                                        | 50 |
| <b>3. Die kurdische Frage und der kurdische Kampf um Selbstbestimmung</b> ..... | 61 |
| 3.1 Kurdistan und seine Bevölkerung .....                                       | 62 |
| 3.1.1 Bevölkerungszusammensetzung Kurdistans .....                              | 63 |
| 3.1.2 Sprachliche Vielfalt .....                                                | 67 |
| 3.2 Die kurdische Frage in Nordkurdistan und der Türkei .....                   | 67 |
| 3.2.1 Die Kurd:innen während des Zerfalls des Osmanischen Reiches .....         | 68 |
| 3.2.2 Das Ende des Ersten Weltkriegs und die Vierteilung Kurdistans .....       | 71 |

|       |                                                                          |     |
|-------|--------------------------------------------------------------------------|-----|
| 3.2.3 | Folgen der Republikgründung für die Kurd:innen .....                     | 75  |
| 3.2.4 | Das Scheitern der frühen kurdischen Aufstände .....                      | 77  |
| 3.2.5 | Das Wiederaufflammen der kurdischen Frage .....                          | 84  |
| 3.2.6 | Debatten über die kurdische Frage innerhalb der türkischen Linken .....  | 85  |
| 3.2.7 | Die Jahre zwischen den Militärputschen .....                             | 87  |
| 3.3   | Die kurdische Frage in Rojava und Syrien .....                           | 90  |
| 3.3.1 | Gründung Syriens und die neue innerkurdische Grenze .....                | 91  |
| 3.3.2 | Die Situation der Kurd:innen unter französischem Protektorat .....       | 91  |
| 3.3.3 | Die Kurd:innen nach der syrischen Unabhängigkeit .....                   | 93  |
| 3.3.4 | Im Fadenkreuz des arabischen Nationalismus .....                         | 95  |
| 3.3.5 | Staatenlosigkeit und Politik des »arabischen Gürtels« .....              | 96  |
| 3.3.6 | Herrschaft der Baath-Partei und »der kurdische Tumor« .....              | 97  |
| 3.3.7 | Die kurdische Frage nach der Machtübernahme von Bashar al-Assad .....    | 98  |
| 3.4   | »Kurdistan ist eine Kolonie« – Die Arbeiterpartei Kurdistans PKK .....   | 100 |
| 3.4.1 | Die Person Öcalans als zentraler Fixpunkt der Organisation .....         | 100 |
| 3.4.2 | Aus den Fehlern der anderen lernen: Erste Gruppenbildung in Ankara ..... | 101 |
| 3.4.3 | Aufbruch nach Kurdistan, Parteigründung und Rückzug .....                | 103 |
| 3.4.4 | Vorbereitung auf den bewaffneten Kampf und Gastgeberrolle Syriens .....  | 105 |
| 3.4.5 | Vom ersten Schuss zum ersten Waffenstillstand .....                      | 105 |
| 3.4.6 | Entführung Öcalans und neuer Kurs .....                                  | 108 |
| 3.4.7 | Paradigmenwechsel der PKK .....                                          | 110 |
| 3.5   | Zwischenfazit: Evolution des kurdisch-nationalen Befreiungskampfes ..... | 117 |

#### **4. Alternative zur Entwicklung? Die Theorie des Demokratischen**

|                                                                                 |     |
|---------------------------------------------------------------------------------|-----|
| <b>Konföderalismus</b> .....                                                    | 121 |
| 4.1 Ablaufmodell der inhaltlichen Strukturierung .....                          | 121 |
| 4.2 Festlegung des Materials – Öcalans Verteidigungseingaben .....              | 123 |
| 4.3 Analyse der Entstehungssituation .....                                      | 125 |
| 4.4 Formale Charakteristika des Materials .....                                 | 126 |
| 4.5 Richtung der Analyse .....                                                  | 126 |
| 4.6 Theoriegeleitete Differenzierung der Fragestellung .....                    | 127 |
| 4.7 Bestimmung der passenden Analysetechnik .....                               | 127 |
| 4.8 Bestimmung der Analyseeinheiten .....                                       | 127 |
| 4.9 Theoriegeleitete Festlegung der inhaltlichen Hauptkategorien .....          | 128 |
| 4.10 Bestimmung der Ausprägungen & Zusammenstellung des Kategoriensystems ..... | 129 |
| 4.10.1 Wiederaneignung der Politik .....                                        | 129 |
| 4.10.2 Wiederaneignung der Ökonomie .....                                       | 129 |
| 4.10.3 Wiederaneignung des Wissens .....                                        | 130 |
| 4.11 Formulierung von Definitionen, Ankerbeispielen und Kodierregeln .....      | 131 |
| 4.12 Materialdurchlauf: Fundstellenbezeichnung .....                            | 137 |

|           |                                                                                                                       |     |
|-----------|-----------------------------------------------------------------------------------------------------------------------|-----|
| 4.13      | Extraktion der Fundstellen – Überarbeitung des Kategoriensystems und Paraphrasierung des extrahierten Materials ..... | 137 |
| 4.14      | Zusammenfassung pro Kategorie und Zusammenfassung pro Hauptkategorie .....                                            | 137 |
| 4.14.1    | Gilgameschs Erben – Bd. I.: Vom sumerischen Priesterstaat zur demokratischen Zivilisation (2001) .....                | 138 |
| 4.14.2    | Gilgameschs Erben – Bd. II.: Vom sumerischen Priesterstaat zur demokratischen Zivilisation (2001) .....               | 146 |
| 4.14.3    | Plädoyer für den freien Menschen (2003) .....                                                                         | 154 |
| 4.14.4    | Jenseits von Staat, Macht und Gewalt (2004) .....                                                                     | 160 |
| 4.14.5    | Zivilisation und Wahrheit – Maskierte Götter und verhüllte Könige (2010) .....                                        | 174 |
| 4.14.6    | Die Kapitalistische Zivilisation – Unmaskierte Götter und nackte Könige (2010) .....                                  | 182 |
| 4.14.7    | Soziologie der Freiheit (2010) .....                                                                                  | 192 |
| 4.15      | Zusammenstellung der Ergebnisse und Interpretation in Richtung der Fragestellung ..                                   | 206 |
| 4.16      | Anwendung der inhaltsanalytischen Gütekriterien .....                                                                 | 209 |
| <b>5.</b> | <b>Demokratischer Konföderalismus in der Praxis – Eine Alternative zur Entwicklung?</b> .....                         | 211 |
| 5.1       | Die Rojava-Revolution – Ein historischer Abriss .....                                                                 | 215 |
| 5.1.1     | Der Kurdische Nationalrat .....                                                                                       | 217 |
| 5.1.2     | Verhältnis zur syrischen Opposition und die Politik des dritten Weges .....                                           | 218 |
| 5.1.3     | Rojava im Visier islamistischer Organisationen .....                                                                  | 219 |
| 5.1.4     | Türkische Militäroffensiven in Nordsyrien .....                                                                       | 221 |
| 5.1.5     | Etappen der Selbstverwaltung .....                                                                                    | 224 |
| 5.2       | Das Selbstverwaltungsmodell von Rojava – Eine Alternative zur Entwicklung? .....                                      | 225 |
| 5.2.1     | Wiederaneignung der Politik in Nord- und Ostsyrien .....                                                              | 226 |
| 5.2.2     | Wiederaneignung der Ökonomie in Nord- und Ostsyrien .....                                                             | 248 |
| 5.2.3     | Wiederaneignung des Wissens in Nord- und Ostsyrien .....                                                              | 255 |
| 5.3       | Fazit zur Wiederaneignung von Politik, Ökonomie und Wissen in Nord- und Ostsyrien .....                               | 264 |
| 5.3.1     | Fazit Wiederaneignung der Politik .....                                                                               | 264 |
| 5.3.2     | Fazit Wiederaneignung der Ökonomie .....                                                                              | 266 |
| 5.3.3     | Fazit Wiederaneignung des Wissens .....                                                                               | 268 |
| <b>6.</b> | <b>Fazit und Ausblick</b> .....                                                                                       | 273 |
| 6.1       | Die Wiederaneignung von Politik, Ökonomie und Wissen im demokratischen Konföderalismus .....                          | 274 |
| 6.2       | Bedeutung der Forschungserkenntnisse und Grenzen der Arbeit .....                                                     | 278 |
| 6.3       | Bedeutung der Forschungsarbeit außerhalb der akademische Welt .....                                                   | 280 |
| 6.4       | Ausblick .....                                                                                                        | 280 |

**Literatur- und Quellenverzeichnis ..... 283**

**Anhangsverzeichnis ..... 299**

## Glossar

---

In diesem Glossar werden Begrifflichkeiten und Organisationsbezeichnungen, die im Zusammenhang mit der »kurdischen Frage« stehen, aufgeschlüsselt. Alle hier definierten Begriffe sind bei ihrer ersten Erwähnung in der Arbeit in kursiv gesetzt.

**Arbeiterpartei Kurdistans:** kurd. Partiya Karkerên Kurdistan, kurz PKK, ist eine 1978 gegründete Partei, die für die Befreiung Kurdistans kämpft. Die PKK nahm zur Umsetzung dieses Ziels 1984 den bewaffneten Kampf auf. Heute tritt die PKK für den Demokratischen Konföderalismus als Gesellschaftskonzept für Kurdistan und den Mittleren Osten ein.

**Autonome Selbstverwaltung von Nord- und Ostsyrien:** kurd. Rêveberiya Xwey a Bakur û Rojhilatê Sûriyê, ist seit 2018 die offizielle Bezeichnung für die selbstverwalteten Gebiete Syriens, die sich im Sinne des Demokratischen Konföderalismus organisieren.

**Azadî:** dt. Freiheit, ist der Name einer kurdischen Untergrundorganisation, die 1923 gegründet wurde und 1925 den Şêx Seîd Aufstand in Nordkurdistan gegen die türkische Republik vorbereitete und unterstützte.

**Befreiungskräfte Kurdistans:** kurd. Hêzen Rizgariya Kurdistan, kurz HRK, ist die erste bewaffnete Organisation der Arbeiterpartei Kurdistans. Ihre Gründung wurde mit der ersten Aktion der Guerillaeinheiten am 15. August 1984 bekanntgegeben. Nachdem sich die Anzahl der Anschlüsse an die Guerilla in den Folgejahren rasant vermehrte, wurde 1986 eine Neustrukturierung der bewaffneten Einheiten vorgenommen. Die HRK wurde aufgelöst und die ARGK (siehe *Volksbefreiungsarmee Kurdistans*) an ihre Stelle gebildet.

**Bewegung für eine Demokratische Gesellschaft:** kurd. Tevgera Civaka Demokratîk, kurz TEV-DEM ist eine 2011 gegründete Dachorganisation aus Nord- und Ostsyrien. TEV-DEM war nach ihrer Gründung für den Aufbau der lokalen Rätestrukturen in der Gesellschaft verantwortlich. Seit 2018 betreut TEV-DEM den Aufbau von zivilgesellschaftlichen Strukturen in Nord- und Ostsyrien.

**Demokratische Kräfte Syriens:** arab. Quwwât Sûriyâ ad-dîmuqrâtîya, kurz QSD, ist ein 2015 gegründetes multiethnisches Militärbündnis, zu dem verschiede-

ne Einheiten aus Nord- und Ostsyrien gehören. Auch die *Frauenverteidigungseinheiten* und *Volksverteidigungseinheiten* sind Teil der Demokratischen Kräfte Syriens.

**Demokratische Partei Kurdistans:** kurd. Partiya Demokrat a Kurdistanê, kurz PDK, ist eine 1946 gegründete kurdische Partei, die heute in *Südkurdistan* die dominante politische Kraft darstellt. Ihr erster Vorsitzender war Mustafa Barzanî. Die PDK gilt gegenwärtig neben der *Arbeiterpartei Kurdistans* (PKK) als einflussreichste kurdische Partei. Sie vertritt eine nationalistisch-konservative politische Agenda und stellt damit gewissermaßen den ideologischen Gegenpol zur PKK innerhalb der kurdischen Gesellschaft dar.

**Demokratische Partei Kurdistans in Syrien:** kurd. Partiya Demokrat a Kurdistanê li Sûriye, kurz PDK-S, ist eine 1957 in Syrien gegründete kurdische Partei. Sie entstand nach dem Vorbild der in *Südkurdistan* agierenden *Demokratischen Partei Kurdistans* unter der Führung Mustafa Barzanîs. Die PDK-S spaltete sich in den nachfolgenden Jahrzehnten gleich mehrfach, ehe sich im Zuge der Rojava-Revolution ein Teil der Spaltungen unter dem *Kurdischen Nationalrat* wieder zusammenfanden.

**Demokratische Partei Kurdistans-Türkei:** kurd. Partiya Demokrat a Kurdistan-Tirkiye, kurz PDK-T, ist eine 1965 in *Nordkurdistan* gegründete politische Partei nach dem Vorbild der in *Südkurdistan* agierenden *Demokratischen Partei Kurdistans*. Die PDK-T musste von Anfang an in der Illegalität agieren, konnte allerdings nie in der Bevölkerung nachhaltig Fuß fassen. Sowohl der Gründer der Partei Faik Bucak als auch sein Nachfolger Sait Elçi wurden ermordet.

**Demokratischer Syrienrat:** kurd. Meclisa Sûriya Demokratîk, kurz MSD, ist eine Dachorganisation, zu der Vertreter:innen der verschiedenen ethnischen und religiösen Strukturen sowie unterschiedliche politische Parteien und zivilgesellschaftliche Gruppen Syriens gehören. Ziel des MSD ist es, eine demokratische Nachkriegsordnung für Syrien zu etablieren.

**Fraueneinheiten von Şengal:** kurd. Yekîneyên Jinên Şengalê, kurz YJŞ, sind die autonomen Verteidigungseinheiten der Frauen aus Şengal. YJŞ wurde nach der Befreiung der Stadt vom IS im August 2015 gegründet.

**Frauenverteidigungseinheiten:** kurd. Yekîneyên Parastina Jin, kurz YPJ, sind die 2012 gegründeten autonomen militärischen Frauenstrukturen der Autonomen Selbstverwaltung von Nord- und Ostsyriens. Die YPJ ist zugleich Teil der *Demokratischen Kräfte Syriens*.

**Gemeinschaft der Gesellschaften Kurdistans:** kurd. Koma Civakên Kurdistan, kurz KCK, ist ein 2005 gegründeter Dachverband für die politischen und gesellschaftlichen Strukturen, die sich im Sinne des Demokratischen Konföderalismus organisieren. Die KCK wurde im Rahmen des Paradigmenwechsels der PKK gegründet.

**Gesellschaft für das Erwachen und den Fortschritt der Kurd:innen:** arab. Kurdistan Ta'ali wa Taraqi Jamiyati, war die erste kurzlebige kurdisch-nationale Organisation im Osmanischen Reich. Sie wurde 1908 von Angehörigen einer jungen Ge-



neration der kurdischen Aristokratie gegründet, die von ihren Familien zum Studium nach Istanbul geschickt wurden und dort mit der Idee des Nationalismus in Berührung kamen.

**Gesellschaft für den Fortschritt in Kurdistan:** türk. Kurdistan Teali Cemiyeti, ist eine kurdische Partei, die nach dem Ende des Ersten Weltkrieges während des Zerfalls des Osmanischen Reiches entstand. Die Partei versuchte unter den Siegermächten für die Anliegen der Kurd:innen zu werben.

**Hohe Kurdische Rat:** kurd. Desteya Bilind a Kurd, ist ein 2012 gegründeter Dachverband in Nord- und Ostsyrien, an dem fünf Vertreter:innen der *Partei der Demokratischen Einheit* und der *Bewegung für eine Demokratische Gesellschaft* sowie fünf Vertreter:innen des *Kurdischen Nationalrates* partizipieren. Der Hohe Kurdische Rat sollte die unterschiedlichen kurdischen Organisationen in der Region zusammenzuführen. Der Versuch scheiterte allerdings an den divergierenden Interessen der Gruppen.

**Kongra Star:** ist eine Dachorganisation aller Frauenstrukturen in Nord- und Ostsyrien. Sie ist die Nachfolgeorganisation des 2005 gegründeten Frauendachverbands *Yekitiya Star*.

**Kongress für Freiheit und Demokratie Kurdistans:** kurd. Kongreya Azadiya Demokrasîya Kurdistan, kurz KADEK, ist die 2002 gegründete und im Folgejahr wieder aufgelöste Nachfolgeorganisation der PKK.

**Kurdischer Nationalrat:** kurd. Encûmena Nîştimanî ya Kurdî li Sûriyeyê, kurz ENKS, ist ein 2011 gegründeter Zusammenschluss verschiedener Parteien, die alle aus der *Demokratischen Partei Kurdistans in Syrien* hervorgegangen sind. Der ENKS versteht sich als politisches Gegengewicht zu den politischen Organisationen, die hinter dem Projekt der Autonomen Selbstverwaltung von Nord- und Ostsyrien stehen.

**Mexmûr:** auch Makhmour, ist ein Geflüchtetenlager im Nordirak, in dem rund 12.000 Menschen leben, die in 1990er Jahren im Zuge des Krieges aus *Nordkurdistans* flüchten mussten. Die Bevölkerung des Camps organisiert sich im Sinne des demokratischen Konföderalismus.

**Nordkurdistans:** ist eine Bezeichnung für die kurdischen Siedlungsgebiete innerhalb der türkischen Staatsgrenzen.

**Ostkurdistans:** ist eine Bezeichnung für die kurdischen Siedlungsgebiete innerhalb der iranischen Staatsgrenzen.

**Partei der Demokratischen Einheit:** kurd. Partiya Yekîtiya Demokrat, kurz PYD, ist eine 2003 gegründete Partei, die in Rojava und Syrien aktiv ist. Die PYD orientiert sich ideologisch an den Ideen Abdullah Öcalans und versteht sich als treibende Kraft hinter dem Aufbau des demokratischen Konföderalismus in Nord- und Ostsyrien.

**Patriotische Union Kurdistans:** kurd. Yekêtiy Nîştimaniy Kurdistan, kurz YNK, ist eine 1975 gegründete kurdische Partei in *Südkurdistans*. Die YNK ist unter der Führung des späteren irakischen Präsidenten Celal Talabani als Abspaltung aus der De-

*mokratischen Partei Kurdistans* hervorgegangen. Sie ist gegenwärtig die zweitgrößte politische Partei in *Südkurdistan*.

**Revolutionäre Kulturvereinigungen des Ostens:** türk. Devrimci Doğu Kültür Ocakları, kurz DDKO, ist eine kurdische Organisation, die 1969 gegründet wurde und in *Nordkurdistan* und der Türkei agierte. Sie ist aus der Arbeiterpartei der Türkei hervorgegangen und stellte als erste Organisation eine Verbindung zwischen einer kurdisch-nationalen und einer sozialistischen Agenda her. Die DDKO wurde 1971 verboten.

**Revolutionäre Kurdistans:** kurd. Şoreşgerên Kurdistan, ist der Name der politischen Organisation um Abdullah Öcalan, aus der 1978 die *Arbeiterpartei Kurdistans* hervorgegangen ist.

**Rojava:** Gängiger Name für die selbstverwalteten Gebiete Nord- und Ostsyriens. Rojava bedeutet auf Deutsch »Westen« und steht für *Westkurdistan*, also die kurdischen Siedlungsgebiete in Syrien.

**Selbstverteidigungseinheiten des Volkes:** kurd. Yekîneyên Xweparastina Gel, kurz YXG, ist die Vorgängerorganisation der 2011 gegründeten *Volksverteidigungseinheiten*.

**Şengal:** ist eine Stadt im Nordirak, die eine traditionelle Heimatregion der êzîdischen Kurd:innen darstellt. Die Stadt wurde 2014 vom sog. Islamischen Staat erobert und die Bevölkerung einem Genozid ausgesetzt. Nach der Befreiung der Stadt vom Islamischen Staat im Jahr 2015 wurden in Teilen Şengals Selbstverwaltungsstrukturen im Sinne des demokratischen Konföderalismus etabliert.

**Volksbefreiungsarmee Kurdistans:** kurd. Artêşa Rizgariya Gelê Kurdistan, kurz ARGK, war ab 1986 der Name für den bewaffneten Arm der PKK. Sie ist die Nachfolgeorganisation der *Befreiungskräfte Kurdistans* und wurde ab 2000 von den *Volksverteidigungskräften* abgelöst.

**Volksbefreiungsfront Kurdistans:** kurd. Eniya Rizgariya Neteweyîya Kurdistanê, kurz ERNK, wurde 1985 von der PKK gegründet und fungierte als Dachorganisation für alle Sympathisant:innen der Partei. Im Rahmen der Neuorientierung der PKK im Zuge des Paradigmenwechsels wurde die ERNK im Jahr 2000 aufgelöst.

**Volkskongress Kurdistans:** kurd. Kongra Gelê Kurdistan, kurz Kongra-Gel, ist eine 2003 auf Vorschlag Öcalans im Zuge des Paradigmenwechsels der PKK gegründete Organisation. Der Kongra-Gel stellt einen Kongress dar, in welchem neben PKK-Verantwortlichen auch zivile Repräsentant:innen aus allen Teilen Kurdistans vertreten sein sollen.

**Volksverteidigungseinheiten:** kurd. Yekîneyên Parastina Gel, kurz YPG, sind die 2011 gegründeten militärischen Strukturen der *Autonomen Selbstverwaltung von Nord- und Ostsyriens*. Die YPG ist zugleich Teil der *Demokratischen Kräfte Syriens*.

**Volksverteidigungskräfte:** kurd. Hêzên Parastina Gel, kurz HPG, ist seit 2000 der Name für die bewaffneten Einheiten unter dem Dach der *Arbeiterpartei Kurdistans*. Die Gründung der HPG erfolgte im Zuge des Paradigmenwechsels der PKK

und geht mit einer Neuausrichtung des Verständnisses für den bewaffneten Kampf einher.

**Westkurdistan:** siehe Rojava

**Widerstandseinheiten von Şengal:** kurd. Yekîneyên Berxwedana Şingal, kurz YBŞ, sind die Verteidigungseinheiten aus Şengal. Die YBŞ wurde 2014 im Zuge der Befreiungsoperation der Stadt Şengal vom sogenannten Islamischen Staat gegründet.

**Xoybûn:** auch Khoybun, ist eine 1927 im Libanon gegründete kurdische Partei, die ab 1928 den Aufstand gegen die türkische Republik im Ararat-Gebirge anführte. Nach der Niederschlagung des Aufstandes widmeten sich die Partei-Mitglieder in Syrien Aktivitäten im Bereich der kurdischen Sprache und Literatur.

**Yekitiya Star:** eine 2005 in *Rojava* gegründete Dachorganisation der kurdischen Frauenstrukturen. Ab 2016 ging Yekitiya Star in *Kongra Star* auf, das eine umfassendere Selbstorganisation der Frauen in Nord- und Ostsyrien gewährleisten soll.

# 1. Einleitung

---

Ende 2014 blickten Millionen Menschen auf der ganzen Welt gebannt auf eine kleine Stadt im Norden Syriens. Die kurdisch besiedelte Stadt mit dem offiziellen Namen Ain al-Arab, zu Deutsch in etwa »Auge der Araber«, galt als das nächste Angriffsziel des sogenannten Islamischen Staates (kurz IS). Tatsächlich gelang es der dschihadistischen Armee im Zuge ihrer Offensive weite Teile der Stadt unter ihre Kontrolle zu bringen. Es wäre ein weiterer Sieg im scheinbar unaufhaltsamen Vormarsch des IS. Doch den Bewohner:innen und den Kämpfer:innen der *Volksverteidigungseinheiten* (kurd. Yekîneyên Parastina Gel, kurz YPG) sowie der *Frauenverteidigungseinheiten* (kurd. Yekîneyên Parastina Jin, kurz YPJ) gelang es schließlich mit Unterstützung der Internationalen Allianz gegen den Islamischen Staat die Stadt nach monatelangen Kämpfen vor den Augen der Weltöffentlichkeit erfolgreich zu verteidigen (Sabio 2016: 75–78). Mit der Schlacht um Kobanê, so der kurdische Name für die Stadt, erlangte die Region Rojava eine zuvor kaum vorstellbare Berühmtheit. Kobanê war die erste Stadt, in der 2012 die »Revolution von Rojava« ausbrach (Flach et al. 2015: 84) und Kobanê war nun auch die Stadt, in der die Revolution gegen den IS erfolgreich verteidigt werden konnte.

Rojava ist der heute gängig gebrauchte Name für eine Region im Norden Syriens, die in etwa der Größe Dänemarks entspricht. Dass der IS nach seinem Siegeszug über weite Teile des Iraks und Syriens hier seine erste militärische Niederlage einstecken musste, sorgte für Anerkennung und Begeisterung in der gesamten Weltöffentlichkeit. Es gibt jedoch noch einen weiteren Grund, weshalb Rojava die Aufmerksamkeit vieler Menschen auf der ganzen Welt auf sich gezogen hat und das weiterhin tut. Dort wird nämlich ein alternatives Gesellschaftsmodell geprobt. Die in Rojava etablierte Selbstverwaltung beruht auf den Prinzipien der Rätedemokratie, der Geschlechterbefreiung und der ökologischen Gerechtigkeit. Ideengeber dieses Modells ist Abdullah Öcalan, der Gründer der *Arbeiterpartei Kurdistans* (kurd. Partiya Karkerên Kurdistan, kurz PKK). Aus seiner Zelle auf einer türkischen Gefängnisinsel heraus, in der er seit 1999 einsitzt, hat Öcalan ein Gesellschaftskonzept entworfen, das Rojava als Vorbild dient und den Namen demokratischer Konföderalismus trägt.

Bereits vor der Revolution von Rojava wurde der demokratische Konföderalismus in kleinerem Maßstab in anderen Teilen Kurdistans geprobt. Das Beispiel Rojava weist jedoch ein Alleinstellungsmerkmal auf. Die territoriale Größe der Region, die mittlerweile mehr als zehnjährige Zeitspanne der praktischen Umsetzung, das weitgehende Fehlen einer staatlichen Autorität als Gegenmacht sowie die multiethnische und multireligiöse Gesellschaftszusammensetzung machen Rojava zu einem besonderen Experimentierfeld für die Idee des demokratischen Konföderalismus. Hier wird die Idee einem wegweisenden Praxistest unterzogen.

Das Konzept des demokratischen Konföderalismus ist das Ergebnis eines langen und steinigen Paradigmenwechsels innerhalb der Arbeiterpartei Kurdistans. Die PKK hatte 1984 den bewaffneten Kampf für einen eigenen kurdischen Staat aufgenommen. Doch bereits 1993 sendete sie mit einem einseitigen Waffenstillstand das Signal aus, wonach die Errichtung eines unabhängigen Nationalstaates nicht zwingend das Ziel des kurdischen Befreiungskampfes darstellen muss. Nach der Entführung und Inhaftierung ihres Vorsitzenden Öcalan hat dieser seine Verteidigungseingaben vor der europäischen Gerichtsbarkeit als Gelegenheit genutzt, den Ansatz weiterzuentwickeln und schließlich ein neues Gesellschaftsmodell vorzustellen, mit dem nicht nur die kurdische Frage gelöst, sondern die Demokratisierung des Mittleren Ostens<sup>1</sup> in Angriff genommen werden soll.<sup>2</sup> Öcalan begreift seine Idee als Antwort auf das Scheitern des Realsozialismus, auf die Desillusionierung im Zuge der antikolonialen Befreiungskämpfe und auf die knapp hundert Jahre andauernde Krise des Mittleren Ostens nach ihrer Neustrukturierung infolge des Ersten Weltkrieges. Er begibt sich in seinen Schriften auf die Suche nach Gründen für die vergangenen Niederlagen von Gesellschaftsmodellen und Bewegungen, die den Anspruch formulierten, eine Alternative zum herrschenden System darzustellen. Die Lehren, die er daraus zieht, münden im Konzept des demokratischen Konföderalismus, das die politische Struktur seiner Theorie darstellt.<sup>3</sup>

---

1 Der Begriff »Mittlerer Osten« (abgeleitet aus dem Englischen »Middle East«) ist, ebenso wie die im deutschsprachigen Raum verwendete Bezeichnung »Naher Osten«, nicht nur in Bezug auf die geographische Einordnung ungenau, er ist auch politisch problematisch, weil sie aus einem eurozentrischen Blickwinkel entstammt. Eine genauere und neutralere geographische Bezeichnung der Region wäre beispielsweise »Westasien« (ArbeiterIn 2022). Obwohl ich diese Kritik teile, habe mich aus Gründen der Einheitlichkeit und einfacheren Verständlichkeit dennoch dazu entschieden, in der vorliegenden Forschungsarbeit die Begrifflichkeit des Mittleren Ostens zu nutzen. Ausschlaggebend für diese Entscheidung war, dass sowohl Öcalan in seinen Schriften als auch meine Interviewpartner:innen durchgängig diese Bezeichnung für die Region nutzen bzw. genutzt haben.

2 Die Geschichte der Arbeiterpartei Kurdistans wird in Abschnitt 3.4 dieser Dissertation behandelt.

3 Die Theorie des demokratischen Konföderalismus ist Gegenstand von Kapitel 4 dieser Arbeit.

In dem als Rojava bekannten Gebieten in Nord- und Ostsyrien wird versucht, dieses Konzept in die Praxis umzusetzen. Das ist ein Experiment mit hoher politischer Sprengkraft. Denn viele Profiteur:innen der bestehenden Ordnung in Syrien und der gesamten Region betrachten das Modell als eine Gefahr. In Rojava wird schließlich ein antistaatliches und demokratisch organisiertes Gesellschaftsmodell geprobt, welches die bestehende Ordnung nicht nur in Frage stellt, sondern langfristig ersetzen will. Erfolgreiche Erfahrungen in Rojava könnten Nachahmungseffekte in andern Teilen der Region bewirken. Daraus erklären sich auch die vielfältigen Angriffe, denen Rojava ausgesetzt ist und die auch zum Zeitpunkt der Niederschrift dieser Zeilen andauern.

Während die einen das dortige Gesellschaftskonzept zu einer Gefahr für die eigenen politischen Interessen erklären, symbolisiert Rojava für andere den Hoffnungsschimmer einer alternativen Ordnung. Menschen aus der ganzen Welt sind in den letzten Jahren nach Rojava gereist, um von den Errungenschaften der Gesellschaft zu lernen und/oder das Selbstverwaltungssystem vor feindlichen Angriffen zu verteidigen. Rojava ist somit zu einem Bezugspunkt für viele Menschen geworden, die die Hoffnung auf ein anderes Leben nicht aufgegeben haben.

Mit einem »anderen Leben« zur dominanten Ordnung des westlichen Kapitalismus beschäftigt sich auch die Post-Development Theorie. Ihr Konzept der »Alternative zur Entwicklung« soll gesellschaftliche Lebensformen jenseits des westlichen »Entwicklungspfades« sichtbar machen. Der gemeinsame Nenner dieser multiplen »Alternativen« ist die Wiederaneignung von Politik, Ökonomie und des Wissens durch die Gesellschaft sowie die Zurückweisung der vermeintlich universalistischen Verwaltungs- und Wissensstrukturen aus dem Globalen Norden. Mit der Frage, ob der demokratische Konföderalismus auch eine solche Alternative im Sinne der Post-Development Theorie darstellt, wird sich die vorliegende Forschungsarbeit beschäftigen.

## 1.1 Stand der Forschung und Forschungslücke

Der Aufbauprozess des Gesellschaftsmodells von Rojava ist auch nach dem zehnten Jahrestag der Revolution, der im Juli 2022 begangen wurde, weiterhin in vollem Gange. Doch auch der Krieg in Syrien dauert weiterhin an, ebenso wie die Angriffe gegen die Bevölkerung Rojavas. Vor diesem Hintergrund ist eine wissenschaftliche Forschungstätigkeit in Rojava kein leichtes Unterfangen. Es gibt zwar mittlerweile ein relativ breites Spektrum an wissenschaftlichen Artikeln und Arbeiten zum Selbstverwaltungsmodell von Rojava, doch die wenigsten von ihnen basieren auf Datenmaterial, das durch Feldforschung vor Ort gesammelt wurde (Dirik 2021: 2). Die vorliegende Arbeit soll einen Beitrag dafür leisten, diese Forschungslücke zu schließen, auch wenn sie aufgrund des fortwährenden Aufbauprozesses der Selbst-

verwaltungsstrukturen in Rojava lediglich eine aktuelle Momentaufnahme darstellen kann.

Obwohl die Theorie des demokratischen Konföderalismus bereits Mitte der 2000er Jahre durch die Arbeiterpartei Kurdistans und ihres inhaftierten Vorsitzenden Öcalan verkündet wurde, lassen sich auch zu diesem Themenkomplex kaum wissenschaftliche Arbeiten ausfindig machen. Eine wichtige Ausnahme bilden die wissenschaftlichen Beiträge von Joost Jongerden, die er zum Teil gemeinsam mit Hamdi Akkaya und anderen Co-Autor:innen verfasst hat. Insbesondere Jongerden und Akkaya haben sich in verschiedenen Artikeln mit der ideologischen Neuausrichtung der Arbeiterpartei Kurdistans und ihrer Hinwendung zum demokratischen Konföderalismus beschäftigt. Eine Auswahl ihrer Beiträge ist im Jahr 2022 in einem deutschsprachigen Sammelwerk erschienen (Jongerden/Akkaya 2022). Eine weitere Ausnahme bildet der Beitrag von Damian Gerber und Shannon Brincat, die sich in ihrem Artikel mit der Theorie des demokratischen Konföderalismus auseinandersetzen und diese mit den Konzepten von Öcalans Ideengeber Murray Bookchin vergleichen (Gerber/Brincat 2018). Darüber hinaus mangelt es an wissenschaftlichen Arbeiten zu dem Konzept des demokratischen Konföderalismus, insbesondere wenn es darum geht, die Verteidigungsschriften Abdullah Öcalans als Quellengrundlage für eine solche Auseinandersetzung zu nehmen. Im vierten Teil dieser Arbeit soll diese Lücke durch die Untersuchung von Öcalans Theorie auf Grundlage seiner Schriften geschlossen werden.

In der Post-Development Theorie nehmen die »Alternativen zur Entwicklung« einen wichtigen Platz ein. In verschiedensten wissenschaftlichen Beiträgen werden Praxisbeispiele aus der gesamten Welt sichtbar gemacht, die alternative Gesellschaftsformen jenseits des sogenannten Entwicklungspfad darstellen. Als klassisches Beispiel innerhalb der Post-Development Theorie gilt das zapatistische Gesellschaftsmodell im mexikanischen Bundesstaat Chiapas, das von unterschiedlichen Autor:innen aufgegriffen und untersucht wurde (u.a. Esteva 2006, Sachs 2006, Gilgenbach/Moser 2012). Daneben nimmt Indien einen wichtigen Platz in den Debatten der Post-Development Theorie ein. So beschäftigen sich beispielsweise verschiedene Autor:innen im Sammelband »Ecologies of Hope & Transformation« mit Alternativen zur Entwicklung aus Indien (Singh et al. 2018). Ein weiteres vielzitiertes Beispiel in der Post-Development Theorie für gesellschaftliche Lebensformen jenseits des Entwicklungspfad ist die Realität der »comunidades negras« – der afrokolumbianischen Gemeinschaften in Kolumbien. Auf der Grundlage von eigenen Forschungsaufenthalten und einem engen Austausch mit den Aktivist:innen der »Proceso de Comunidades Negras«, eine Dachorganisation von zahlreichen afrokolumbianischen Basisgruppen, ist Arturo Escobars Werk »Territories of Difference – place, movements, life, redes« entstanden. Darin setzt er sich nicht nur mit der Lebensrealität der Community auseinander, sondern zeigt auch ihre politischen

und gesellschaftlichen Visionen auf, die eine Alternative zur Entwicklung darstellen (Escobar 2008: X).

Eine Alternative zur Entwicklung stellt auch das Konzept des »Buen Vivir« dar, das von indigenen Gemeinschaften in Ecuador und Bolivien umgesetzt wird. In beiden Ländern haben die Prinzipien des Buen Vivir teilweise sogar Eingang in die Verfassung gefunden, insbesondere im Hinblick auf die Rechte der Natur und die Anerkennung des Grundrechts auf Wasser (Acosta 2017a: 74). Zum Buen Vivir gehört sowohl die Idee des plurinationalen Staates, in dem viele verschiedene nationale Identitäten einen gleichberechtigten Platz finden sollen, als auch die Ablehnung der Fortschrittsideologie und des Primats des Wirtschaftswachstums (Acosta 2017b: 130, 145f.). Auch wenn das Buen Vivir kein universalistisches Konzept ist, so handelt es sich laut Acosta doch um eine globale Idee. Denn ähnliche Grundannahmen wie im Buen Vivir sieht er u.a. in der Ubuntu-Philosophie (Gemeinschaftsinn) in den subafrikanischen Ländern und dem Konzept des Swaraj (Selbstregierung) aus Indien verwirklicht (Acosta 2017a: 73). Die beiden letzteren Konzepte werden im Übrigen ebenfalls als Alternativen zur Entwicklung von der Post-Development Theorie aufgegriffen (Ziai 2017: 2548). Darüber hinaus liefern Schaffar und Ziai in ihrem gemeinsamen Beitrag einen Einblick in alternative Gesellschaftskonzepte im Sinne der Post-Development Theorie aus Thailand (Suffizienzwirtschaft) und dem Iran (Gharbzadegi) (Schaffar/Ziai 2018). Ein weiteres wichtiges Sammelwerk mit verschiedensten Praxisbeispielen für Alternativen zur Entwicklung wurde 2019 von Elise Klein und Carlos Eduardo Morreo herausgegeben. In »Postdevelopment in Practice. Alternatives, Economies, Ontologies« setzen sich die Autor:innen in verschiedenen Beiträgen mit Beispielen für »Alternativen zur Entwicklung« aus Regionen des Globalen Südens, aber auch aus dem Globalen Norden, auseinander (Klein/Morreo 2019).

Noch keinen richtigen Eingang in die Debatten der Post-Development Theorie hingegen hat die Idee des demokratischen Konföderalismus und ihre Umsetzung in Rojava gefunden. Diese Leerstelle zu füllen, stellt eine der Hauptmotivationen für die vorliegende Forschungsarbeit dar.

## 1.2 Fragestellung

Die Forschungsfrage der vorliegenden Arbeit lautet: Stellt der Demokratische Konföderalismus eine Alternative zur Entwicklung im Sinne der Post-Development Theorie dar?

Diese Frage soll zunächst auf der Ebene der Theorie beantwortet werden. Als Datengrundlage dienen die Verteidigungsschriften, die Abdullah Öcalan nach seiner Inhaftierung verfasst hat. Im zweiten Schritt soll die Umsetzung des demokratischen Konföderalismus in Rojava bzw. Nord- und Ostsyrien untersucht werden, um



zu prüfen, ob das Konzept in der Praxis als eine Alternative im Sinne der Post-Development Theorie betrachtet werden kann. Dieser Teil der Untersuchung basiert auf Expert:inneninterviews mit lokalen Aktivist:innen, die ich während eines Forschungsaufenthalts in der Region im Jahr 2021 durchgeführt habe.

Ziel der Forschungsarbeit ist es, mit Hilfe der Post-Development Theorie ein umfassendes Verständnis für den demokratischen Konföderalismus auf theoretischer und praktischer Ebene zu gewinnen. Darüber hinaus soll, sofern die Fragestellung der Forschungsarbeit positiv beantwortet werden kann, die Post-Development Theorie mit dem Rojava-Beispiel um eine weitere »Alternative zur Entwicklung« bereichert werden.

### 1.3 Theoretischer Zugang und Methode

Wie bereits aufgezeigt, bildet die Post-Development Theorie den theoretischen Rahmen der vorliegenden Arbeit. Ihr Konzept der »Alternative zur Entwicklung« wird hierbei die Grundlage für das Kategoriensystem darstellen, mit dessen Hilfe ich das Datenmaterial der Forschungsarbeit im Sinne der Fragestellung untersuchen werde. Dieser theoretische Zugang ermöglicht es uns, gesellschaftliche Systeme in Theorie und Praxis ausfindig und sichtbar zu machen, die mit den Grundsätzen des Entwicklungsdiskurses und des Universalismusanspruchs westlicher Gesellschaftskonzepte und Wissenssysteme brechen sowie die Wiederaneignung der Politik, der Ökonomie und des Wissens durch die Gesellschaft möglich machen.

Das Datenmaterial für die Untersuchung der Theorie des demokratischen Konföderalismus bilden die Verteidigungsschriften Abdullah Öcalans. Bei der Untersuchung des umfangreichen Materials wird regelgeleitet nach den Vorgaben der »qualitativen Inhaltsanalyse« nach Philipp Mayring vorgegangen (Mayring 2010). Dieses methodische Vorgehen ermöglicht es, im Hinblick auf die Forschungsfrage relevante Inhalte aus dem Datenmaterial zu extrahieren und auszuwerten (ebd.: 92ff.). Für die Untersuchung der praktischen Umsetzung des demokratischen Konföderalismus in Rojava wird auf Leitfadeninterviews mit Expert:innen zurückgegriffen. Die ausgewählten Gesprächspartner:innen kommen aus verschiedenen politischen und gesellschaftlichen Strukturen und haben in ihren Arbeitsbereichen zum Teil jahrelange Erfahrungen gesammelt, was sie zu Expert:innen ihres Feldes macht. Bei der Auswahl der Interviewpartner:innen wurde darauf geachtet, dass diese die Bereiche Politik, Ökonomie und Wissen – also die drei Grundpfeiler der »Alternative zur Entwicklung« – abdecken. Bei einem Leitfadeninterview kann der oder die Gesprächspartner:in eigene inhaltliche Schwerpunkte setzen. Zugleich besteht für den/die Interviewer:in die Möglichkeit, den Gesprächsverlauf in einem gewissen Maße im Sinne der Fragestellung zu steuern. Dabei wird der Maxime »so offen wie möglich, so strukturierend wie nötig« vorgegangen (Helfferich 2019: 876). Die Aus-

wertung der Daten aus den Expert:inneninterviews wird entsprechend der drei Bereiche des Konzepts der »Alternative zur Entwicklung« in »Wiederaneignung der Politik«, »Wiederaneignung der Ökonomie« und »Wiederaneignung des Wissens« unterteilt.

## 1.4 Begriffsdefinitionen

Bevor ich den Aufbau der Dissertation vorstelle, möchte ich an dieser Stelle noch einige Begriffsdefinitionen festhalten, die für die weitere Arbeit von Relevanz sind. In seinen Verteidigungsschriften führt Abdullah Öcalan immer wieder neue Begriffe und Konzepte ein, die er mit dem Attribut »demokratisch« versieht. Dazu gehören unter anderem »demokratische Republik«, »demokratische Autonomie«, »demokratische Zivilisation«, »demokratische Moderne« oder die »demokratische Nation«. Ich werde die Konzepte, die Öcalan im Zuge der ideologischen Neuausrichtung der PKK entwirft, zunächst im Abschnitt »Paradigmenwechsel der PKK« (Kap. 3.4.7) vorstellen, bevor ich sie in Kapitel vier dieser Arbeit genauer definieren werde.

Der »demokratische Konföderalismus« übernimmt in Öcalans Theorie die Funktion der politischen Struktur (Öcalan 2020: 466). Wenn in der vorliegenden Forschungsarbeit vom »demokratischen Konföderalismus« die Rede ist, so wird darunter aus Gründen der einfacheren Verständlichkeit die gesamte Gesellschaftstheorie verstanden. Bei der Beantwortung der Fragestellung dieser Arbeit werde ich mich somit nicht bloß mit den politischen Strukturen, die im Sinne von Öcalans Konzept aufgebaut werden sollen, beschäftigen, sondern mit seiner Theorie als Ganzes.

Der in diesem Teil der Arbeit verwendete Begriff »Kurdistan« bezeichnet die traditionellen Siedlungsgebiete der Kurd:innen in allen vier Staaten, auf welche sie aufgeteilt sind. Es handelt sich also um eine geografische Bezeichnung, die jedoch nicht eindeutig abgrenzbar ist. So gibt es beispielsweise ehemals mehrheitlich von Kurd:innen bewohnte Orte, in denen sich heute die Bevölkerungsverhältnisse durch freiwilligen oder unfreiwilligen Zu- bzw. Wegzug verändert haben. Andererseits gibt es Orte, auf welche die Kurd:innen ebenso historische Ansprüche erheben wie andere Gemeinschaften oder die jeweiligen Zentralstaaten. Dennoch wird der Begriff in dieser Arbeit verwendet, weil dies die Eigenbezeichnung der Kurd:innen für ihre traditionellen Siedlungsgebiete ist. Dies schließt allerdings nicht aus, dass diese Regionen auch anders bezeichnet werden können und ist auch nicht als Wertung zu verstehen, ob ein »umstrittener Ort« nun zu Kurdistan gehört oder nicht. Da die Kurd:innen diese durch staatliche Grenzen voneinander getrennten Gebiete als ihr zusammenhängendes Siedlungsgebiet betrachten, verwenden sie auch die Bezeichnungen *Nordkurdistan* (Südosten der Türkei), *Ostkurdistan* (Nordwesten des Iran), *Südkurdistan* (Nordirak) und *Westkurdistan* bzw. *Rojava* (für Teile Nordsyriens).

Auch wenn die Zuordnung zu den Himmelsrichtungen nicht ganz exakt ist, werden die genannten Bezeichnungen der kurdischen Siedlungsgebiete unter den Kurd:innen vielfach verwendet. Der Einfachheit halber werde auch ich in dieser Arbeit auf diese Bezeichnungen zurückgreifen. Wenn also beispielsweise von »Südkurdistan« die Rede ist, so ist dies als Synonym für den Nordirak bzw. die mehrheitlich von Kurd:innen bewohnten Gebiete des Iraks zu verstehen. Der Begriff »Rojava« ist kurdisch und bedeutet »Westen«. Die Bezeichnung Rojava wird heute jedoch nicht nur für die mehrheitlich kurdischen Gebiete in Nordsyrien verwendet, sondern für alle Gebiete Nord- und Ostsyriens, in denen das Selbstverwaltungssystem nach den Prinzipien des demokratischen Konföderalismus etabliert wurde. Denn die »Revolution von Rojava« hat zwar, wie in Kapitel fünf näher ausgeführt werden wird, in den kurdischen Siedlungsgebieten Nordsyriens ihren Anfang genommen, sich im Zuge des Kampfes gegen den IS allerdings auf weitere, mehrheitlich arabische Gebiete Nord- und Ostsyriens ausgeweitet. Die in der Forschungsarbeit verwendeten Begriffe »Zentralmacht«, »Zentralstaat« oder »Zentralregierung« beziehen sich auf die Staatsgewalt der jeweiligen Länder, auf welche die kurdischen Siedlungsgebiete heute aufgeteilt sind.

## 1.5 Aufbau der Arbeit und Vorgehen

Die Forschungsarbeit beginnt im nachfolgenden Kapitel mit einer Einführung in die Post-Development Theorie. Die Post-Development-Theorie ist ein entwicklungstheoretischer Zugang, der eine »Fundamentalkritik der Entwicklung« (Ziai 2012) darstellt. Um diese Kritik nachvollziehen zu können, wird im zweiten Kapitel dieser Arbeit zunächst die Geschichte des Entwicklungsdiskurses und sein praktischer Niederschlag in der Entwicklungspolitik erörtert. Anschließend stelle ich die Positionen der Post-Development Theorie zum Entwicklungsdiskurs dar und widme mich ihrem Konzept der »Alternative zur Entwicklung«. Zum Abschluss des Kapitels werde ich anhand der Ausführungen der Post-Development Theorie zu gesellschaftlichen Alternativen jenseits des Entwicklungspfades ein vorläufiges Kategoriensystem entwickeln, mit dem in den späteren Teilen der Arbeit die Untersuchung des demokratischen Konföderalismus in der Theorie und in der Praxis vorgenommen werden soll.

Im dritten Kapitel soll die kurdische Frage, ihre Geschichte und der Kampf der Kurd:innen um Anerkennung und Selbstbestimmung dargestellt werden. Dieses Kapitel verfolgt das Ziel, den demokratischen Konföderalismus als Lösungsmodell für die kurdische Frage in einen historischen Kontext zu setzen und soll aufzeigen, dass der demokratische Konföderalismus einen qualitativen Wandel im Selbstbestimmungskampf der Kurd:innen darstellt. Das Kapitel beginnt mit einigen einführenden Informationen zur Geographie und Bevölkerungszusammensetzung

Kurdistans. Anschließend widme ich mich nacheinander den historischen Verläufen der kurdischen Frage in der Türkei (bzw. in Nordkurdistan) und in Syrien (bzw. Rojava), bevor ich mich abschließend mit der Geschichte der Arbeiterpartei Kurdistans auseinandersetze. Ausgeklammert werden in diesem Kapitel die historischen Entwicklungen in den kurdischen Siedlungsgebieten des Iraks und des Irans. Die kurdische Frage ist zwar auch Teil der Geschichte und Gegenwart dieser beiden Staaten. Doch in Bezug auf die Entstehung und Umsetzung des demokratischen Konföderalismus spielen der Irak und der Iran nur eine untergeordnete Rolle und können deshalb für die Beantwortung der Forschungsfrage vernachlässigt werden. Nordkurdistan hingegen ist relevant, weil die Arbeiterpartei Kurdistans hier ihren Ursprung hat, während die Geschichte Syriens bzw. Rojawas für die Untersuchung der praktischen Umsetzung des demokratischen Konföderalismus von Bedeutung ist. Abgeschlossen wird dieses Kapitel mit einem Überblick über die Evolution des kurdischen Befreiungskampfes. Hier soll zusammenfassend dargestellt werden, weshalb die PKK mit ihrem Lösungsmodell des demokratischen Konföderalismus eine neue historische Etappe im kurdischen Befreiungskampf repräsentiert.

Wodurch sich diese Etappe im Besonderen auszeichnet, wird im nachfolgenden vierten Kapitel der Arbeit erörtert. Hier werde ich mich dem ersten Teil der Fragestellung dieser Forschungsarbeit widmen. Die Untersuchung der Frage, ob die Theorie des demokratischen Konföderalismus eine Alternative zur Entwicklung im Sinne der Post-Development Theorie darstellt, soll mit Hilfe der Methode der inhaltlichen Strukturierung als Teilbereich der qualitativen Inhaltsanalyse beantwortet werden. Die Untersuchung erfolgt systematisch und schrittweise nach den Vorgaben von Mayring. Das umfangreiche Datenmaterial umfasst die Verteidigungsschriften Abdullah Öcalans, aus deren Inhalt mit Hilfe des in Kapitel zwei erarbeiteten Kategoriensystems relevante Informationen extrahiert und im Sinne der Fragestellung zusammengefasst werden. Die Untersuchung verläuft chronologisch nach dem Datum der Verschriftlichung des Materials, wodurch auch die Entwicklung in Öcalans Denken nachgezeichnet werden kann.

Das daran anknüpfende fünfte Kapitel beschäftigt sich mit der praktischen Umsetzung von Öcalans Ideen in Rojava bzw. Nord- und Ostsyrien. In diesem Kapitel soll der zweite Teil der Forschungsfrage, nämlich ob der demokratische Konföderalismus in seiner praktischen Umsetzung eine Alternative zur Entwicklung darstellt, beantwortet werden. Die Datengrundlage für die Beantwortung dieser Frage bildet ein Korpus von 28 Expert:inneninterviews, die ich im Rahmen eines mehrmonatigen Forschungsaufenthalts in der Region führen durfte. Angelehnt an das vorgenannte Kategoriensystem werden die transkribierten und übersetzten Gesprächsinhalte entsprechend der Teilbereiche des Konzepts der Alternative zur Entwicklung, als »Wiederaneignung der Politik«, »Wiederaneignung der Ökonomie« und »Wiederaneignung des Wissens« strukturiert und im Sinne der Fragestellung aufgearbeitet.

Abgerundet wird die Arbeit durch ein Fazit, in dem die wichtigsten Erkenntnisse der Forschungsarbeit nochmals prägnant zusammengefasst werden sollen. Außerdem sollen die wissenschaftliche sowie allgemeine Relevanz der Forschungsarbeit erörtert, die Grenzen der Dissertation diskutiert und weiterführende Fragen für die zukünftige Forschung aufgezeigt werden.

Ich habe mich bei dieser Dissertation für eine gegenderte Schreibweise mit »Doppelpunkt« entschieden. Auf diese Weise soll die Vielfalt der Geschlechter mitberücksichtigt werden. Das generische Maskulinum wird nur in Originalziten verwendet. Die Namen von Organisationen, Parteien und anderen Strukturen, die in der Dissertation vorkommen, werden bei ihrer Erstbenennung kursiv gesetzt. Dabei füge ich in Klammern die jeweilige Bezeichnung in der Originalsprache sowie die gängige Abkürzung an. Alle kursiv gesetzten Bezeichnungen tauchen im Glossar der Forschungsarbeit auf.
